# Supplementary material
Source: PubMed Central journal article supplement (PMC2818397)
Supplement: ajn0030-0413_s01a.pdf [file ajn0030-0413_s01a.pdf]

**Supplementary table 1. Endogenous RT-PCR controls and their corresponding TaqMan<sup>®</sup> assay and Affymetrix<sup>®</sup> probeset IDs**

| <b>Gene symbol</b> | <b>Gene name</b>                                                 | <b>TaqMan<sup>®</sup> assay ID</b> | <b>Affymetrix<sup>®</sup> probeset IDs</b>                                                          |
|--------------------|------------------------------------------------------------------|------------------------------------|-----------------------------------------------------------------------------------------------------|
| <i>Actb</i>        | actin, beta                                                      | Mm00607939_s1                      | AFFX-b-ActinMur/M12481_5_at, AFFX-b-ActinMur/M12481_M_at, AFFX-b-ActinMur/M12481_3_at, 1436722_a_at |
| <i>B2m</i>         | beta-2-microglobulin                                             | Mm00437762_m1                      | 1452428_a_at, 1449289_a_at                                                                          |
| <i>Gapdh</i>       | glyceraldehyde-3-phosphate dehydrogenase                         | Mm99999915_g1                      | AFFX-GapdhMur/M32599_5_at, AFFX-GapdhMur/M32599_M_at, AFFX-GapdhMur/M32599_3_at                     |
| <i>Gusb</i>        | glucuronidase, beta                                              | Mm00446953_m1                      | 1430332_a_at, 1448124_at                                                                            |
| <i>Hmbs</i>        | hydroxymethylbilane synthase                                     | Mm01158417_g1                      | 1426475_at, 1436930_x_at                                                                            |
| <i>Hprt1</i>       | hypoxanthine guanine phosphoribosyl transferase 1                | Mm00446968_m1                      | 1448736_a_at                                                                                        |
| <i>Ipo8</i>        | importin 8                                                       | Mm01255158_m1                      | 1426760_at, 1452185_at                                                                              |
| <i>Pgk1</i>        | phosphoglycerate kinase 1                                        | Mm00435617_m1                      | 1417864_at, 1438640_x_at, 1439435_x_at                                                              |
| <i>Polr2a</i>      | polymerase (RNA) II (DNA directed) polypeptide A                 | Mm00839493_m1                      | 1422311_a_at, 1426242_at                                                                            |
| <i>Ppia</i>        | peptidylprolyl isomerase A (cyclophilin A)                       | Mm02342430_g1                      | 1417451_a_at                                                                                        |
| <i>Rplp2</i>       | ribosomal protein, large, P2                                     | Mm00782638_s1                      | 1415879_a_at                                                                                        |
| <i>Tbp</i>         | TATA box binding protein                                         | Mm00446973_m1                      | 1426469_a_at, 1426470_at                                                                            |
| <i>Tfrc</i>        | transferrin receptor (p90, CD71)                                 | Mm00441941_m1                      | 1422966_a_at, 1422967_a_at, 1452661_at                                                              |
| <i>Ubc</i>         | ubiquitin C                                                      | Mm01201237_m1                      | 1425965_at, 1425966_x_at, 1454373_x_at                                                              |
| <i>Ywhaz</i>       | Tyr 3-monooxygenase/Trp 5-monooxygenase activation protein, zeta | Mm00660262_g1                      | 1416102_at, 1416103_at, 1436971_x_at, 1436981_a_at, 1439005_x_at, 1448218_s_at, 1448219_a_at        |
| <i>18S rRNA</i>    | 18S rRNA                                                         | Hs99999901_s1                      | AFFX-18SRNAMur/X00686_5_at, AFFX-18SRNAMur/X00686_M_at, AFFX-18SRNAMur/X00686_3_at                  |

**Supplementary table 2. Ranking of variance and equivalence of RT-PCR controls**

| Gene symbol     | TaqMan <sup>®</sup> data |             | Affymetrix <sup>®</sup> array data |             |
|-----------------|--------------------------|-------------|------------------------------------|-------------|
|                 | Overall variance         | Equivalence | Overall variance                   | Equivalence |
| <i>Ppia</i>     | 1                        | 1           | 1                                  | 1           |
| <i>Gapdh</i>    | 2                        | 2           | 3                                  | 3           |
| <i>Pgk1</i>     | 3                        | 3           | 4                                  | 4           |
| <i>Gusb</i>     | 4                        | 4           | 11                                 | 12          |
| <i>Polr2a</i>   | 6                        | 5           | 10                                 | 9           |
| <i>Tbp</i>      | 7                        | 6           | 5                                  | 6           |
| <i>Ipo8</i>     | 5                        | 8           | 14                                 | 14          |
| <i>Actb</i>     | 8                        | 7           | 2                                  | 2           |
| <i>Ubc</i>      | 10                       | 9           | 8                                  | 8           |
| <i>Tfrc</i>     | 9                        | 10          | 13                                 | 11          |
| <i>Hprt1</i>    | 11                       | 12          | 9                                  | 10          |
| <i>Ywhaz</i>    | 13                       | 11          | 15                                 | 15          |
| <i>B2m</i>      | 12                       | 14          | 16                                 | 16          |
| <i>Rplp2</i>    | 14                       | 13          | 7                                  | 7           |
| <i>18S rRNA</i> | 15                       | 15          | 12                                 | 13          |
| <i>Hmbs</i>     | 16                       | 16          | 6                                  | 5           |
